# Supplementary material for: Altered lung biology of healthy never smokers following acute inhalation of E-cigarettes
Source: PubMed Central journal article supplement (PMC5950177; doi:10.1186/s12931-018-0778-z), 2018-05-14
Supplement: 12931_2018_778_MOESM1_ESM.pdf [file 12931_2018_778_MOESM1_ESM.pdf]

## Supplemental Methods

### Inclusion / exclusion criteria for healthy never smokers

**Inclusion criteria.** All study subjects should be willing and able to provide informed consent for the follow up study with repeated bronchoscopies. Subjects will be male and female  $\geq 21$  yr of age. All subjects will be self-reported never-smokers whose urine nicotine and cotinine levels confirm undetectable levels ( $<2$  ng/ml nicotine;  $<5$  ng/ml cotinine) at entry into the study. Subjects must be willing to use electronic cigarettes in a brief, standardized exposure.

#### Inclusion criteria

- Males and females, age 21 or older
- Must be capable of providing informed consent
- Self-reported never-smokers, with current smoking status validated by the absence of nicotine metabolites in urine (nicotine  $<2$  ng/ml and cotinine  $<5$  ng/ml)
- Normal physical examination
- Good overall health without history of chronic lung disease, including asthma, and without recurrent or recent (within 3 months) acute pulmonary disease
- Normal routine laboratory evaluation, including general hematologic studies, general serologic/immunologic studies, general biochemical analyses, and urine analysis
- Not taking any medications relevant to lung disease or having an effect on the airway epithelium
- Negative HIV serology
- Normal chest X-ray (PA and lateral)
- Normal electrocardiogram (sinus bradycardia, premature atrial contractions are permissible)
- Females - not pregnant
- No history of allergies to medications to be used in the bronchoscopy procedure
- Willingness to participate in the study

#### Exclusion criteria

- Unable to meet the inclusion criteria
- Current active infection or acute illness of any kind
- Evidence of malignancy within the past 5 years
- Current alcohol or drug abuse
- Pregnancy

## **Initiation of E-cigarette Use “Symptom Scale” Questionnaire**

# Weill Cornell Initiation of E-Cigarette, Vital Signs and Questionnaire

Subject ID: ECIG -  Exposure Visit:  Day Date of Visit:  -  -

## E-Cigarette Effects Scale: First Inhalation – Assessed 30 minutes after 10 puffs.

(0= totally disagree, 1=mostly disagree, 2=more or less agree, 3=mostly agree, 4=totally agree)

- |                                     |                            |                            |                            |                            |                            |
|-------------------------------------|----------------------------|----------------------------|----------------------------|----------------------------|----------------------------|
| 1. Feeling light-headed             | <input type="checkbox"/> 0 | <input type="checkbox"/> 1 | <input type="checkbox"/> 2 | <input type="checkbox"/> 3 | <input type="checkbox"/> 4 |
| 2. Feeling jittery                  | <input type="checkbox"/> 0 | <input type="checkbox"/> 1 | <input type="checkbox"/> 2 | <input type="checkbox"/> 3 | <input type="checkbox"/> 4 |
| 3. Feeling dizzy                    | <input type="checkbox"/> 0 | <input type="checkbox"/> 1 | <input type="checkbox"/> 2 | <input type="checkbox"/> 3 | <input type="checkbox"/> 4 |
| 4. Feeling relaxed                  | <input type="checkbox"/> 0 | <input type="checkbox"/> 1 | <input type="checkbox"/> 2 | <input type="checkbox"/> 3 | <input type="checkbox"/> 4 |
| 5. Feeling nausea                   | <input type="checkbox"/> 0 | <input type="checkbox"/> 1 | <input type="checkbox"/> 2 | <input type="checkbox"/> 3 | <input type="checkbox"/> 4 |
| 6. Feeling like you have vomit      | <input type="checkbox"/> 0 | <input type="checkbox"/> 1 | <input type="checkbox"/> 2 | <input type="checkbox"/> 3 | <input type="checkbox"/> 4 |
| 7. Feeling tense                    | <input type="checkbox"/> 0 | <input type="checkbox"/> 1 | <input type="checkbox"/> 2 | <input type="checkbox"/> 3 | <input type="checkbox"/> 4 |
| 8. Feeling like you have a headache | <input type="checkbox"/> 0 | <input type="checkbox"/> 1 | <input type="checkbox"/> 2 | <input type="checkbox"/> 3 | <input type="checkbox"/> 4 |
| 9. Feeling confused                 | <input type="checkbox"/> 0 | <input type="checkbox"/> 1 | <input type="checkbox"/> 2 | <input type="checkbox"/> 3 | <input type="checkbox"/> 4 |
| 10. Feeling excited                 | <input type="checkbox"/> 0 | <input type="checkbox"/> 1 | <input type="checkbox"/> 2 | <input type="checkbox"/> 3 | <input type="checkbox"/> 4 |

## E-Cigarette Effects Scale: Second Inhalation – Assessed 30 minutes after 10 more puffs.

- |                                      |                            |                            |                            |                            |                            |
|--------------------------------------|----------------------------|----------------------------|----------------------------|----------------------------|----------------------------|
| 11. Feeling light-headed             | <input type="checkbox"/> 0 | <input type="checkbox"/> 1 | <input type="checkbox"/> 2 | <input type="checkbox"/> 3 | <input type="checkbox"/> 4 |
| 12. Feeling jittery                  | <input type="checkbox"/> 0 | <input type="checkbox"/> 1 | <input type="checkbox"/> 2 | <input type="checkbox"/> 3 | <input type="checkbox"/> 4 |
| 13. Feeling dizzy                    | <input type="checkbox"/> 0 | <input type="checkbox"/> 1 | <input type="checkbox"/> 2 | <input type="checkbox"/> 3 | <input type="checkbox"/> 4 |
| 14. Feeling relaxed                  | <input type="checkbox"/> 0 | <input type="checkbox"/> 1 | <input type="checkbox"/> 2 | <input type="checkbox"/> 3 | <input type="checkbox"/> 4 |
| 15. Feeling nausea                   | <input type="checkbox"/> 0 | <input type="checkbox"/> 1 | <input type="checkbox"/> 2 | <input type="checkbox"/> 3 | <input type="checkbox"/> 4 |
| 16. Feeling like you have vomit      | <input type="checkbox"/> 0 | <input type="checkbox"/> 1 | <input type="checkbox"/> 2 | <input type="checkbox"/> 3 | <input type="checkbox"/> 4 |
| 17. Feeling tense                    | <input type="checkbox"/> 0 | <input type="checkbox"/> 1 | <input type="checkbox"/> 2 | <input type="checkbox"/> 3 | <input type="checkbox"/> 4 |
| 18. Feeling like you have a headache | <input type="checkbox"/> 0 | <input type="checkbox"/> 1 | <input type="checkbox"/> 2 | <input type="checkbox"/> 3 | <input type="checkbox"/> 4 |
| 19. Feeling confused                 | <input type="checkbox"/> 0 | <input type="checkbox"/> 1 | <input type="checkbox"/> 2 | <input type="checkbox"/> 3 | <input type="checkbox"/> 4 |
| 20. Feeling excited                  | <input type="checkbox"/> 0 | <input type="checkbox"/> 1 | <input type="checkbox"/> 2 | <input type="checkbox"/> 3 | <input type="checkbox"/> 4 |

## E-Cigarette Effects Scale: Assessed 30 minutes after 10 puffs.

(0= totally disagree, 1=mostly disagree, 2=more or less agree, 3=mostly agree, 4=totally agree)

## **Initiation of E-cigarette Vital Signs Data Form**

# Weill Cornell Initiation of E-Cigarette, Vital Signs and Questionnaire

Subject ID: ECIG -  Exposure Visit:  Day Date of Visit:  -  -

## PART A: TO BE COMPLETED BY DGM STAFF

### Baseline Assessment

Time Vital Signs Taken: \_\_\_\_\_

#### Vital Signs Pre-Exposure

Blood pressure / mm Hg  
Temperature . °F or °C (*circle*)  
Heart Rate  per minute  
Respiration  per minute  
Oxygen saturation  %

### 1<sup>st</sup> Inhalation of e-cigarette (10 puffs)

Time Exposure Finished: \_\_\_\_\_

Time Vital Signs Taken: \_\_\_\_\_

#### Vital Signs Post-Exposure

Blood pressure / mm Hg  
Temperature . °F or °C (*circle*)  
Heart Rate  per minute  
Respiration  per minute  
Oxygen saturation  %

**\*Have the subject complete: E-Cigarette Effects Scale – Assessed 30 minutes after 10 puff.**

### 2<sup>nd</sup> Inhalation of e-cigarette (10 puffs)

Time Exposure Finished: \_\_\_\_\_

Time Vital Signs Taken: \_\_\_\_\_

#### Vital Signs Post-Exposure

Blood pressure / mm Hg  
Temperature . °F or °C (*circle*)  
Heart Rate  per minute  
Respiration  per minute  
Oxygen saturation  %

DGM Staff: \_\_\_\_\_

Print

Signature

Date

Supplemental Table I. E-cigarette Effects Scale<sup>1</sup>

| Phenotype           | Sub-<br>ject | First inhalation (10 puffs) |                    |                  |                    |                   |                                         |                  |                                           |                     |                    | Second inhalation (10 puffs) |                    |                  |                    |                   |                                         |                  |                                           |                     |                    |   |
|---------------------|--------------|-----------------------------|--------------------|------------------|--------------------|-------------------|-----------------------------------------|------------------|-------------------------------------------|---------------------|--------------------|------------------------------|--------------------|------------------|--------------------|-------------------|-----------------------------------------|------------------|-------------------------------------------|---------------------|--------------------|---|
|                     |              | Feeling<br>light-<br>headed | Feeling<br>jittery | Feeling<br>dizzy | Feeling<br>relaxed | Feeling<br>nausea | Feeling<br>like you<br>have to<br>vomit | Feeling<br>tense | Feeling<br>like you<br>have a<br>headache | Feeling<br>confused | Feeling<br>excited | Feeling<br>light-<br>headed  | Feeling<br>jittery | Feeling<br>dizzy | Feeling<br>relaxed | Feeling<br>nausea | Feeling<br>like you<br>have to<br>vomit | Feeling<br>tense | Feeling<br>like you<br>have a<br>headache | Feeling<br>confused | Feeling<br>excited |   |
| With<br>nicotine    | 1            | 0                           | 0                  | 0                | 3                  | 0                 | 0                                       | 1                | 0                                         | 0                   | 2                  | 0                            | 0                  | 0                | 3                  | 0                 | 0                                       | 0                | 0                                         | 0                   | 0                  | 2 |
|                     | 2            | 0                           | 0                  | 0                | 3                  | 0                 | 0                                       | 0                | 0                                         | 0                   | 0                  | 1                            | 0                  | 1                | 1                  | 0                 | 0                                       | 0                | 0                                         | 0                   | 0                  | 0 |
|                     | 3            | 0                           | 0                  | 0                | 4                  | 0                 | 0                                       | 0                | 0                                         | 0                   | 0                  | 0                            | 0                  | 0                | 4                  | 0                 | 0                                       | 0                | 0                                         | 0                   | 0                  | 0 |
|                     | 4            | 0                           | 0                  | 0                | 4                  | 0                 | 0                                       | 0                | 0                                         | 0                   | 0                  | 0                            | 1                  | 0                | 3                  | 0                 | 0                                       | 0                | 1                                         | 0                   | 0                  | 0 |
|                     | 5            | 1                           | 0                  | 0                | 1                  | 0                 | 0                                       | 0                | 0                                         | 0                   | 0                  | 0                            | 1                  | 1                | 0                  | 0                 | 0                                       | 1                | 0                                         | 0                   | 0                  | 0 |
|                     | 6            | 0                           | 0                  | 0                | 4                  | 0                 | 0                                       | 0                | 0                                         | 0                   | 0                  | 0                            | 0                  | 0                | 0                  | 0                 | 0                                       | 0                | 0                                         | 0                   | 0                  | 0 |
|                     | 7            | 0                           | 0                  | 0                | 1                  | 1                 | 0                                       | 0                | 0                                         | 0                   | 0                  | 0                            | 0                  | 0                | 1                  | 1                 | 0                                       | 0                | 0                                         | 0                   | 0                  | 0 |
| Without<br>nicotine | 8            | 0                           | 0                  | 0                | 3                  | 0                 | 0                                       | 0                | 0                                         | 0                   | 0                  | 2                            | 0                  | 0                | 3                  | 0                 | 0                                       | 0                | 1                                         | 0                   | 0                  | 0 |
|                     | 9            | 2                           | 0                  | 2                | 4                  | 0                 | 0                                       | 0                | 0                                         | 0                   | 0                  | 2                            | 0                  | 2                | 4                  | 0                 | 0                                       | 0                | 1                                         | 0                   | 0                  | 0 |
|                     | 10           | 0                           | 0                  | 0                | 2                  | 0                 | 0                                       | 0                | 0                                         | 0                   | 0                  | 0                            | 0                  | 0                | 2                  | 0                 | 0                                       | 0                | 0                                         | 0                   | 0                  | 0 |

<sup>1</sup> 0= totally disagree, 1=mostly disagree, 2=more or less agree, 3=mostly agree, 4=totally agree

**Supplemental Table IIA. Initiation of E-cigarette Vital Signs**

| Phenotype        | Subject | Baseline  |           |        |          |                               | First Inhalation (10 puffs) |           |        |          |                               | Second Inhalation (10 puffs) |           |        |          |                               |
|------------------|---------|-----------|-----------|--------|----------|-------------------------------|-----------------------------|-----------|--------|----------|-------------------------------|------------------------------|-----------|--------|----------|-------------------------------|
|                  |         | BP (mmHG) | Temp (C°) | Hr/min | Resp/min | O <sub>2</sub> saturation (%) | BP (mmHG)                   | Temp (C°) | Hr/min | Resp/min | O <sub>2</sub> saturation (%) | BP (mmHG)                    | Temp (C°) | Hr/min | Resp/min | O <sub>2</sub> saturation (%) |
| With nicotine    | 1       | 109/63    | 36.7      | 107    | 18       | 98                            | 122/69                      | 36.3      | 101    | 16       | 100                           | 116/71                       | 36.4      | 102    | 17       | 97                            |
|                  | 2       | 105/58    | 35.4      | 53     | 14       | 100                           | 102/55                      | 35.5      | 54     | 16       | 100                           | 114/58                       | 35.3      | 57     | 16       | 100                           |
|                  | 3       | 105/57    | 34.9      | 67     | 12       | 100                           | 101/51                      | 35.4      | 65     | 14       | 98                            | 105/51                       | 35.6      | 64     | 16       | 99                            |
|                  | 4       | 114/62    | 36.2      | 67     | 14       | 99                            | 108/64                      | 36.1      | 70     | 10       | 99                            | 107/70                       | 35.7      | 61     | 10       | 99                            |
|                  | 5       | 100/64    | 36.3      | 65     | 13       | 100                           | 105/69                      | 36.1      | 65     | 16       | 100                           | 118/74                       | 35.9      | 68     | 20       | 100                           |
|                  | 6       | 105/67    | 36.1      | 60     | 14       | 97                            | 108/71                      | 35.5      | 66     | 12       | 97                            | 111/73                       | 36.3      | 75     | 14       | 99                            |
|                  | 7       | 111/56    | 35.8      | 61     | 18       | 98                            | 103/62                      | 35.7      | 58     | 20       | 100                           | 109/63                       | 35.9      | 54     | 18       | 99                            |
| Without nicotine | 8       | 102/62    | 36.2      | 66     | 14       | 99                            | 105/68                      | 36.2      | 66     | 10       | 99                            | 109/64                       | 36.4      | 74     | 18       | 100                           |
|                  | 9       | 134/63    | 36.4      | 95     | 16       | 97                            | 117/68                      | 35.8      | 97     | 12       | 97                            | 141/63                       | 36.1      | 83     | 10       | 97                            |
|                  | 10      | 102/55    | 36.7      | 87     | 14       | 100                           | 104/57                      | 36.8      | 84     | 12       | 97                            | 108/68                       | 36.3      | 80     | 10       | 100                           |

**Supplemental Table IIB. Time point Differences of E-cigarette Vital Signs**

| Phenotype                     | 1 <sup>st</sup> Inhalation (10 puffs) - Baseline |           |          |          |                               | Second Inhalation (10 puffs) - Baseline |           |           |          |                               |
|-------------------------------|--------------------------------------------------|-----------|----------|----------|-------------------------------|-----------------------------------------|-----------|-----------|----------|-------------------------------|
|                               | MAP <sup>1</sup> for BP (mmHG)                   | Temp (C°) | Hr/min   | Resp/min | O <sub>2</sub> saturation (%) | MAP <sup>1</sup> for BP (mmHG)          | Temp (C°) | Hr/min    | Resp/min | O <sub>2</sub> saturation (%) |
| With nicotine <sup>2</sup>    | 1.3±4.7                                          | -0.1±0.4  | -0.1±4.0 | 0.1±2.7  | 0.3±1.4                       | 4.6±5.1                                 | 0.0±0.4   | 0.1±7.8   | 1.1±3.6  | 0.1±1.1                       |
| Without nicotine <sup>2</sup> | 1.6±3.7                                          | -0.2±0.4  | -0.3±2.5 | -3.3±1.2 | -1.0±1.7                      | 5.6±4.5                                 | -0.2±0.3  | -3.7±10.4 | -2.0±5.3 | 0.3±0.6                       |
| p value <sup>3</sup>          | 0.2                                              | 0.7       | 0.9      | 0.6      | 0.8                           | 0.3                                     | 1         | 0.6       | 0.7      | 0.3                           |

<sup>1</sup> Mean arterial pressure (MAP) = (2\*diastolic pressure + systolic pressure)/3 used for blood pressure statistics.

<sup>2</sup> Data presented as average ± standard deviation.

<sup>3</sup> p value calculated using a 2-tailed Student's t-test with unequal variance.

**Supplemental Table III. Urine Nicotine Metabolites Pre- and Post-Exposure to E-Cigarette Aerosols<sup>1</sup>**

| Phenotype        | Subject | Baseline |          |             |           | Post-e-cigarette exposure |          |             |           |
|------------------|---------|----------|----------|-------------|-----------|---------------------------|----------|-------------|-----------|
|                  |         | Nicotine | Cotinine | Nornicotine | Anabasine | Nicotine                  | Cotinine | Nornicotine | Anabasine |
| With nicotine    | 1       | <2.0     | <5.0     | <2.0        | <2.0      | <2.0                      | <5.0     | <2.0        | <2.0      |
|                  | 2       | <2.0     | <5.0     | <2.0        | <2.0      | <2.0                      | <5.0     | <2.0        | <2.0      |
|                  | 3       | <2.0     | <5.0     | <2.0        | <2.0      | <2.0                      | <5.0     | <2.0        | <2.0      |
|                  | 4       | <2.0     | <5.0     | <2.0        | <2.0      | <2.0                      | <5.0     | <2.0        | <2.0      |
|                  | 5       | <2.0     | <5.0     | <2.0        | <2.0      | <2.0                      | <5.0     | <2.0        | <2.0      |
|                  | 6       | <2.0     | <5.0     | <2.0        | <2.0      | <2.0                      | <5.0     | <2.0        | <2.0      |
|                  | 7       | <2.0     | <5.0     | <2.0        | <2.0      | <2.0                      | <5.0     | <2.0        | <2.0      |
| Without nicotine | 8       | <2.0     | <5.0     | <2.0        | <2.0      | <2.0                      | <5.0     | <2.0        | <2.0      |
|                  | 9       | <2.0     | <5.0     | <2.0        | <2.0      | <2.0                      | <5.0     | <2.0        | <2.0      |
|                  | 10      | <2.0     | <5.0     | <2.0        | <2.0      | <2.0                      | <5.0     | <2.0        | <2.0      |

<sup>1</sup> All urine nicotine metabolite values are normal for never smokers



**Supplemental Table IV. Small Airway Epithelium Differentially Expressed Genes Following Acute Inhalation of E-cigarettes with Nicotine<sup>1</sup>**

| <b>Gene symbol</b>          | <b>Gene title</b>                                                                                       | <b>Fold-change<sup>2</sup></b> | <b>p value</b>       |
|-----------------------------|---------------------------------------------------------------------------------------------------------|--------------------------------|----------------------|
| <b>Up-regulated genes</b>   |                                                                                                         |                                |                      |
| LINC01186                   | Long intergenic non-protein coding RNA 1186                                                             | 2.21                           | 1.4x10 <sup>-4</sup> |
| AJUBA                       | Ajuba LIM protein                                                                                       | 1.69                           | 8.6x10 <sup>-4</sup> |
| LATS2                       | large tumor suppressor kinase 2                                                                         | 1.56                           | 3.0x10 <sup>-3</sup> |
| TMEM220-AS1                 | TMEM220 (transmembrane Protein 220) Antisense RNA 1                                                     | 2.65                           | 8.2x10 <sup>-3</sup> |
| AMOTL2                      | Angiomotin like 2                                                                                       | 2.10                           | 1.3x10 <sup>-2</sup> |
| SERPINB2                    | Serpin peptidase inhibitor, clade B (ovalbumin), member 2                                               | 1.61                           | 1.3x10 <sup>-2</sup> |
| FDPSP2                      | Farnesyl diphosphate synthase pseudogene 2                                                              | 1.56                           | 1.3x10 <sup>-2</sup> |
| CST6                        | Cystatin E/M                                                                                            | 1.74                           | 1.6x10 <sup>-2</sup> |
| RND3                        | Rho family GTPase 3                                                                                     | 1.53                           | 1.9x10 <sup>-2</sup> |
| SND1-IT1                    | SND1 (staphylococcal nuclease and Tudor domain containing 1) intronic transcript 1 (non-protein coding) | 1.50                           | 2.2x10 <sup>-2</sup> |
| SMIM4                       | Small integral membrane protein 4                                                                       | 1.72                           | 2.6x10 <sup>-2</sup> |
| EDN1                        | Endothelin 1                                                                                            | 1.76                           | 2.6x10 <sup>-2</sup> |
| C19orf60                    | Chromosome 19 open reading frame 60                                                                     | 1.51                           | 3.2x10 <sup>-2</sup> |
| LIMD1-AS1                   | LIMD1 (LIM domains containing 1) Antisense RNA 1                                                        | 1.61                           | 3.3x10 <sup>-2</sup> |
| LOC101929224                | Uncharacterized LOC101929224                                                                            | 1.68                           | 3.5x10 <sup>-2</sup> |
| LOC101927604                | Uncharacterized LOC101927604                                                                            | 2.59                           | 3.5x10 <sup>-2</sup> |
| TRAPPC5                     | Trafficking protein particle complex 5                                                                  | 1.51                           | 4.0x10 <sup>-2</sup> |
| OR7E12P                     | Olfactory receptor, family 7, subfamily E, member 12 pseudogene                                         | 1.61                           | 4.0x10 <sup>-2</sup> |
| CCDC68                      | Coiled-coil domain containing 68                                                                        | 1.66                           | 4.5x10 <sup>-2</sup> |
| <b>Down-regulated genes</b> |                                                                                                         |                                |                      |
| BEST3                       | Bestrophin 3                                                                                            | -2.81                          | 2.1x10 <sup>-3</sup> |
| MYL5                        | Myosin, light chain 5, regulatory                                                                       | -1.62                          | 2.2x10 <sup>-3</sup> |
| MT1X                        | Metallothionein 1X                                                                                      | -1.91                          | 2.9x10 <sup>-3</sup> |
| SGK1                        | Serum/glucocorticoid regulated kinase 1                                                                 | -1.60                          | 3.8x10 <sup>-3</sup> |
| MT2A                        | Metallothionein 2A                                                                                      | -1.50                          | 4.9x10 <sup>-3</sup> |
| LINC00882                   | Long intergenic non-protein coding RNA 882                                                              | -1.82                          | 6.0x10 <sup>-3</sup> |
| NR1D1                       | Nuclear receptor subfamily 1 group D member 1                                                           | -1.76                          | 6.1x10 <sup>-3</sup> |
| NEURL3                      | Neuralized E3 ubiquitin protein ligase 3                                                                | -1.83                          | 6.5x10 <sup>-3</sup> |
| NR1D2                       | Nuclear receptor subfamily 1, group D, member 2                                                         | -1.52                          | 9.2x10 <sup>-3</sup> |
| KIF14                       | Kinesin family member 14                                                                                | -1.50                          | 9.3x10 <sup>-3</sup> |
| ATAD2                       | ATPase family, AAA domain containing 2                                                                  | -1.51                          | 1.1x10 <sup>-2</sup> |
| CYP26A1                     | Cytochrome P450, family 26, subfamily A, polypeptide 1                                                  | -2.68                          | 1.1x10 <sup>-2</sup> |
| RPL21                       | Ribosomal protein L21                                                                                   | -1.78                          | 1.2x10 <sup>-2</sup> |
| FLJ20021                    | Uncharacterized LOC90024                                                                                | -1.52                          | 1.2x10 <sup>-2</sup> |
| LOC101929395                | Uncharacterized LOC101929395                                                                            | -3.70                          | 1.3x10 <sup>-2</sup> |
| NDC80                       | NDC80 kinetochore complex component                                                                     | -1.61                          | 1.3x10 <sup>-2</sup> |
| CCL3L3                      | C-C motif chemokine ligand 3 Like 3                                                                     | -3.48                          | 1.5x10 <sup>-2</sup> |
| FAM124A                     | Family with sequence similarity 124A                                                                    | -1.70                          | 1.6x10 <sup>-2</sup> |
| PER3                        | Period circadian clock 3                                                                                | -1.63                          | 1.6x10 <sup>-2</sup> |

**Supplemental Table IV. Small Airway Epithelium Differentially Expressed Genes Following Acute Inhalation of E-cigarettes with Nicotine<sup>1</sup> (cont., page 2)**

| <b>Gene symbol</b> | <b>Gene title</b>                                                                                                                                                    | <b>Fold-change<sup>2</sup></b> | <b>p value</b>       |
|--------------------|----------------------------------------------------------------------------------------------------------------------------------------------------------------------|--------------------------------|----------------------|
| LYPD3              | LY6/PLAUR domain containing 3                                                                                                                                        | -1.62                          | 1.6x10 <sup>-2</sup> |
| LOC100505683       | Uncharacterized LOC100505683                                                                                                                                         | -1.78                          | 1.7x10 <sup>-2</sup> |
| HIF3A              | Hypoxia inducible factor 3, alpha subunit                                                                                                                            | -1.76                          | 1.8x10 <sup>-2</sup> |
| SMTNL1             | Smoothelin-like 1                                                                                                                                                    | -2.35                          | 1.8x10 <sup>-2</sup> |
| KRTAP5-7           | Keratin associated protein 5-7                                                                                                                                       | -5.59                          | 1.9x10 <sup>-2</sup> |
| LINC01189          | Long intergenic non-protein coding RNA 1189                                                                                                                          | -2.51                          | 2.1x10 <sup>-2</sup> |
| RPS14P3            | Ribosomal protein S14 pseudogene 3                                                                                                                                   | -1.95                          | 2.2x10 <sup>-2</sup> |
| SUSD3              | Sushi domain containing 3                                                                                                                                            | -1.98                          | 2.3x10 <sup>-2</sup> |
| C19orf57           | Chromosome 19 open reading frame 57                                                                                                                                  | -1.66                          | 2.3x10 <sup>-2</sup> |
| PPP1R16B           | Protein phosphatase 1, regulatory subunit 16B                                                                                                                        | -1.62                          | 2.5x10 <sup>-2</sup> |
| SGOL1              | Shugoshin-like 1 (S. pombe)                                                                                                                                          | -1.71                          | 3.0x10 <sup>-2</sup> |
| RPS17              | Ribosomal protein S17                                                                                                                                                | -1.68                          | 3.0x10 <sup>-2</sup> |
| RRM2               | Ribonucleotide reductase M2                                                                                                                                          | -1.58                          | 3.3x10 <sup>-2</sup> |
| CRYBB2             | Crystallin, beta B2                                                                                                                                                  | -3.54                          | 3.4x10 <sup>-2</sup> |
| SLAMF6             | SLAM (signaling lymphocytic activation molecule) family member 6                                                                                                     | -1.67                          | 3.6x10 <sup>-2</sup> |
| DRICH1             | Aspartate-rich 1                                                                                                                                                     | -1.78                          | 3.8x10 <sup>-2</sup> |
| HCAR3              | Hydroxycarboxylic acid receptor 3                                                                                                                                    | -1.64                          | 3.9x10 <sup>-2</sup> |
| CXCL11             | Chemokine (C-X-C motif) ligand 11                                                                                                                                    | -1.92                          | 4.0x10 <sup>-2</sup> |
| MKI67              | Marker of proliferation Ki-67                                                                                                                                        | -1.80                          | 4.1x10 <sup>-2</sup> |
| C16orf95           | Chromosome 16 open reading frame 95                                                                                                                                  | -1.65                          | 4.1x10 <sup>-2</sup> |
| REGG               | RAS-like, estrogen-regulated, growth inhibitor                                                                                                                       | -1.68                          | 4.1x10 <sup>-2</sup> |
| MSANTD3-TMEFF1     | MSANTD3 (Myb/SANT DNA binding domain containing 3) - TMEFF1 (transmembrane protein with EGF like and two follistatin like domains 1) naturally-occurring readthrough | -1.73                          | 4.2x10 <sup>-2</sup> |
| TMPRSS11D          | Transmembrane protease, serine 11D                                                                                                                                   | -2.60                          | 4.2x10 <sup>-2</sup> |
| FUOM               | Fucose mutarotase                                                                                                                                                    | -2.41                          | 4.2x10 <sup>-2</sup> |
| IP6K3              | Inositol hexakisphosphate kinase 3                                                                                                                                   | -1.86                          | 4.3x10 <sup>-2</sup> |
| PHKA2-AS1          | PHKA2 [phosphorylase kinase, alpha 2 (liver)] antisense RNA 1                                                                                                        | -1.63                          | 4.4x10 <sup>-2</sup> |
| CCL17              | Chemokine (C-C motif) ligand 17                                                                                                                                      | -1.86                          | 4.5x10 <sup>-2</sup> |
| ZBTB16             | Zinc finger and BTB domain containing 16                                                                                                                             | -1.78                          | 4.6x10 <sup>-2</sup> |
| GPRC5B             | G protein-coupled receptor, class C, group 5, member B                                                                                                               | -1.57                          | 4.7x10 <sup>-2</sup> |
| GDA                | Guanine deaminase                                                                                                                                                    | -1.75                          | 4.8x10 <sup>-2</sup> |
| TMEM86A            | Transmembrane protein 86A                                                                                                                                            | -1.56                          | 4.9x10 <sup>-2</sup> |
| CST7               | Cystatin F (leukocystatin)                                                                                                                                           | -2.03                          | 4.9x10 <sup>-2</sup> |
| MAN1C1             | Mannosidase, alpha, class 1C, member 1                                                                                                                               | -1.53                          | 5.0x10 <sup>-2</sup> |

<sup>1</sup> RNA sequencing analysis of the SAE from n=7 users of E-cigarettes with nicotine vs baseline naïve, never smoker SAE from matched individuals. Genes are listed based on p value of gene expression after exposure compared to pre-exposure of the same individuals.

<sup>2</sup> Fold-change = mean FPKM expression in E-cigarette with nicotine smokers/mean FPKM expression in never smokers.

**Supplemental Table V. Small Airway Epithelium Differentially Expressed Genes Following Acute Inhalation of E-cigarettes without Nicotine<sup>1</sup>**

| Gene symbol               | Gene title                                                                                                                              | Fold-change <sup>2</sup> | p value              |
|---------------------------|-----------------------------------------------------------------------------------------------------------------------------------------|--------------------------|----------------------|
| <b>Up-regulated genes</b> |                                                                                                                                         |                          |                      |
| LTB4R2                    | Leukotriene B4 receptor 2                                                                                                               | 1.52                     | 1.4x10 <sup>-3</sup> |
| ISG20                     | Interferon stimulated exonuclease gene 20kDa                                                                                            | 1.68                     | 2.6x10 <sup>-3</sup> |
| GRHL3                     | Grainyhead-like 3 (drosophila)                                                                                                          | 1.82                     | 5.5x10 <sup>-3</sup> |
| TXK                       | TXK tyrosine kinase                                                                                                                     | 1.63                     | 5.5x10 <sup>-3</sup> |
| CNFN                      | Cornifelin                                                                                                                              | 8.04                     | 6.4x10 <sup>-3</sup> |
| LOC101926888              | Uncharacterized LOC101926888                                                                                                            | 1.75                     | 8.0x10 <sup>-3</sup> |
| LGALS7B                   | Lectin, galactosidase binding soluble 7B                                                                                                | 2.53                     | 9.3x10 <sup>-3</sup> |
| ERCC6-PGBD3               | ERCC6 (Excision Repair Cross-Complementation Group 6) - PGBD3 (PiggyBac transposable element derived 3) naturally-occurring readthrough | 3.42                     | 1.0x10 <sup>-2</sup> |
| LOC554206                 | Leucine carboxyl methyltransferase 1 pseudogene                                                                                         | 1.60                     | 1.1x10 <sup>-2</sup> |
| KLRF1                     | Killer cell lectin-like receptor subfamily F, member 1                                                                                  | 1.81                     | 1.2x10 <sup>-2</sup> |
| LAMTOR5-AS1               | LAMTOR5 (late endosomal/lysosomal adaptor, MAPK and MTOR activator 5) antisense RNA 1                                                   | 2.02                     | 1.3x10 <sup>-2</sup> |
| BATF3                     | Basic leucine zipper transcription factor, ATF-like 3                                                                                   | 3.30                     | 1.4x10 <sup>-2</sup> |
| VAMP5                     | Vesicle-associated membrane protein 5                                                                                                   | 1.74                     | 1.5x10 <sup>-2</sup> |
| SPDEF                     | SAM pointed domain containing ETS transcription factor                                                                                  | 1.89                     | 1.6x10 <sup>-2</sup> |
| GALNT14                   | Polypeptide N-acetylgalactosaminyltransferase 14                                                                                        | 1.93                     | 1.6x10 <sup>-2</sup> |
| SLC5A8                    | Solute carrier family 5 (sodium/monocarboxylate cotransporter), member 8                                                                | 2.00                     | 1.7x10 <sup>-2</sup> |
| S100P                     | S100 calcium binding protein P                                                                                                          | 1.90                     | 2.0x10 <sup>-2</sup> |
| CEACAM5                   | Carcinoembryonic antigen-related cell adhesion molecule 5                                                                               | 4.50                     | 2.0x10 <sup>-2</sup> |
| CTTNBP2                   | Cortactin binding protein 2                                                                                                             | 1.51                     | 2.2x10 <sup>-2</sup> |
| LINC00589                 | Long intergenic non-protein coding RNA 589                                                                                              | 1.76                     | 2.5x10 <sup>-2</sup> |
| AQP6                      | Aquaporin 6, kidney specific                                                                                                            | 1.71                     | 2.6x10 <sup>-2</sup> |
| BCL2L14                   | BCL2 (B-cell CLL/lymphoma 2)-like 14 (apoptosis facilitator)                                                                            | 1.57                     | 2.7x10 <sup>-2</sup> |
| CIDCEP                    | Cell death-inducing DFFA-like effector c pseudogene                                                                                     | 1.99                     | 2.8x10 <sup>-2</sup> |
| FGFBP1                    | Fibroblast growth factor binding protein 1                                                                                              | 1.68                     | 2.8x10 <sup>-2</sup> |
| SLC39A8                   | Solute carrier family 39 (zinc transporter), member 8                                                                                   | 1.56                     | 2.9x10 <sup>-2</sup> |
| NRN1L                     | Neuritin 1 like                                                                                                                         | 4.62                     | 2.9x10 <sup>-2</sup> |
| PRSS35                    | Protease, serine, 35                                                                                                                    | 2.37                     | 3.1x10 <sup>-2</sup> |
| GPR157                    | G protein-coupled receptor 157                                                                                                          | 1.57                     | 3.2x10 <sup>-2</sup> |
| C2CD4A                    | C2 calcium-dependent domain containing 4A                                                                                               | 2.44                     | 3.2x10 <sup>-2</sup> |
| C2orf70                   | Chromosome 2 open reading frame 70                                                                                                      | 1.79                     | 3.5x10 <sup>-2</sup> |
| CDRT15P1                  | CMT1A (Charcot-Marie-tooth neuropathy 1A) duplicated region transcript 15 pseudogene 1                                                  | 1.56                     | 3.5x10 <sup>-2</sup> |
| ADM2                      | Adrenomedullin 2                                                                                                                        | 1.74                     | 3.6x10 <sup>-2</sup> |
| SEMA3B                    | Sema domain, immunoglobulin domain (Ig), short basic domain, secreted, (semaphorin) 3B                                                  | 1.55                     | 3.9x10 <sup>-2</sup> |
| GPRC5D                    | G protein-coupled receptor, class C, group 5, member D                                                                                  | 1.56                     | 4.2x10 <sup>-2</sup> |
| DGUOK-AS1                 | DGUOK (deoxyguanosine kinase) antisense RNA 1                                                                                           | 1.85                     | 4.5x10 <sup>-2</sup> |

**Supplemental Table V. Small Airway Epithelium Differentially Expressed Genes Following Acute Inhalation of E-cigarettes without Nicotine<sup>1</sup> (cont., page 2)**

| Gene symbol                 | Gene title                                                                                                                                 | Fold-change <sup>2</sup> | p value              |
|-----------------------------|--------------------------------------------------------------------------------------------------------------------------------------------|--------------------------|----------------------|
| ITPR1-AS1                   | ITPR1 (inositol 1,4,5-trisphosphate receptor type 1) anti-sense RNA 1 (head to head)                                                       | 1.51                     | 4.5x10 <sup>-2</sup> |
| SMC5-AS1                    | SMC5 (structural maintenance of chromosomes 5) anti-sense RNA 1 (head to head)                                                             | 2.66                     | 4.5x10 <sup>-2</sup> |
| C19orf73                    | Chromosome 19 open reading frame 73                                                                                                        | 3.41                     | 4.5x10 <sup>-2</sup> |
| FAM178B                     | Family with sequence similarity 178, member B                                                                                              | 1.70                     | 4.6x10 <sup>-2</sup> |
| SYCE1                       | Synaptonemal complex central element protein 1                                                                                             | 4.37                     | 4.7x10 <sup>-2</sup> |
| <b>Down-regulated genes</b> |                                                                                                                                            |                          |                      |
| DNASE1L2                    | Deoxyribonuclease I-like 2                                                                                                                 | -2.25                    | 5.3x10 <sup>-3</sup> |
| LINC00892                   | Long intergenic non-protein coding RNA 892                                                                                                 | -6.58                    | 6.1x10 <sup>-3</sup> |
| TMEM220-AS1                 | TMEM220-AS1 (transmembrane protein 220) antisense RNA 1                                                                                    | -3.14                    | 1.4x10 <sup>-2</sup> |
| LINC00882                   | Long intergenic non-protein coding RNA 882                                                                                                 | -1.71                    | 1.5x10 <sup>-2</sup> |
| TMEM171                     | Transmembrane protein 171                                                                                                                  | -4.02                    | 1.5x10 <sup>-2</sup> |
| PLXDC1                      | Plexin domain containing 1                                                                                                                 | -1.58                    | 2.1x10 <sup>-2</sup> |
| CALML5                      | Calmodulin-like 5                                                                                                                          | -8.21                    | 2.6x10 <sup>-2</sup> |
| RAD51L3-RFFL                | RAD51L3 (RAD51 paralog D) - RFFL (ring finger and FYVE-like domain containing E3 ubiquitin protein ligase) naturally-occurring readthrough | -6.02                    | 2.7x10 <sup>-2</sup> |
| KCNK15                      | Potassium channel, subfamily K, member 15                                                                                                  | -1.95                    | 2.7x10 <sup>-2</sup> |
| DLGAP5                      | Discs, large (Drosophila) homolog-associated protein 5                                                                                     | -1.61                    | 2.9x10 <sup>-2</sup> |
| GNB1L                       | Guanine nucleotide binding protein (G protein), beta polypeptide 1-like                                                                    | -2.12                    | 3.0x10 <sup>-2</sup> |
| ALG1L9P                     | Asparagine-linked glycosylation 1-like 9, pseudogene                                                                                       | -1.82                    | 3.3x10 <sup>-2</sup> |
| LOC101927571                | Uncharacterized LOC101927571                                                                                                               | -5.14                    | 3.4x10 <sup>-2</sup> |
| LOC101928370                | Uncharacterized LOC101928370                                                                                                               | -2.38                    | 3.4x10 <sup>-2</sup> |
| NKAPL                       | NFKB (Nuclear Factor Kappa B) activating protein-like                                                                                      | -1.50                    | 3.7x10 <sup>-2</sup> |
| LOC100128494                | Uncharacterized LOC100128494                                                                                                               | -1.78                    | 4.0x10 <sup>-2</sup> |
| LOC100288637                | OTU deubiquitinase 7A pseudogene                                                                                                           | -1.50                    | 4.0x10 <sup>-2</sup> |
| LOC101929395                | Uncharacterized LOC101929395                                                                                                               | -2.57                    | 4.4x10 <sup>-2</sup> |
| PEG3-AS1                    | PEG3 (paternally expressed 3) antisense RNA 1                                                                                              | -2.86                    | 4.5x10 <sup>-2</sup> |
| IFNE                        | Interferon, epsilon                                                                                                                        | -1.88                    | 4.6x10 <sup>-2</sup> |
| C9orf106                    | Chromosome 9 open reading frame 106                                                                                                        | -1.79                    | 4.7x10 <sup>-2</sup> |
| SNX29P1                     | Sorting nexin 29 pseudogene 1                                                                                                              | -1.87                    | 4.8x10 <sup>-2</sup> |
| CTC-436P18.1                | Uncharacterized LOC101928630                                                                                                               | -5.31                    | 4.9x10 <sup>-2</sup> |
| LINC01134                   | Long intergenic non-protein coding RNA 1134                                                                                                | -2.24                    | 4.9x10 <sup>-2</sup> |
| PER3                        | Period circadian clock 3                                                                                                                   | -1.68                    | 4.9x10 <sup>-2</sup> |

<sup>1</sup> RNA sequencing analysis of the SAE from n=7 users of E-cigarettes without nicotine vs baseline naïve, never smoker SAE from matched individuals. Genes are listed based on p value of gene expression after exposure compared to pre-exposure of the same individuals.

<sup>2</sup> Fold-change = mean FPKM expression in E-cigarette with nicotine smokers/mean FPKM expression in never smokers.

**Supplemental Table VI. Alveolar Macrophage Differentially Expressed Genes Following Acute Inhalation of E-cigarettes with Nicotine<sup>1</sup>**

| Gene symbol                 | Gene title                                                                                   | Fold-change <sup>2</sup> | p value              |
|-----------------------------|----------------------------------------------------------------------------------------------|--------------------------|----------------------|
| <b>Up-regulated genes</b>   |                                                                                              |                          |                      |
| LINC00571                   | Long intergenic non-protein coding RNA 571                                                   | 2.22                     | 4.9x10 <sup>-3</sup> |
| RPL13P5                     | Ribosomal protein L13 pseudogene 5                                                           | 1.84                     | 1.1x10 <sup>-2</sup> |
| LOC100506368                | Uncharacterized LOC100506368                                                                 | 1.86                     | 1.8x10 <sup>-2</sup> |
| LOC100289473                | Cytoskeleton associated protein 2-like pseudogene                                            | 3.99                     | 3.6x10 <sup>-2</sup> |
| LAMTOR5-AS1                 | LAMTOR5 (late endosomal/lysosomal adaptor, MAPK And MTOR activator 5) antisense RNA 1        | 7.84                     | 4.5x10 <sup>-2</sup> |
| ICAM4                       | Intercellular adhesion molecule 4 (landsteiner-wiener blood group)                           | 1.93                     | 4.6x10 <sup>-2</sup> |
| <b>Down-regulated genes</b> |                                                                                              |                          |                      |
| LOC101927124                | Uncharacterized LOC101927124                                                                 | -2.57                    | 2.4x10 <sup>-3</sup> |
| AGAP2-AS1                   | AGAP2 (ArfGAP with GTPase domain, ankyrin Repeat and PH domain 2) antisense RNA 1            | -1.81                    | 8.4x10 <sup>-3</sup> |
| LOC100379224                | Uncharacterized LOC100379224                                                                 | -1.86                    | 9.4x10 <sup>-3</sup> |
| CCNT2-AS1                   | CCNT2 (Cyclin T2) antisense RNA 1                                                            | -1.73                    | 1.2x10 <sup>-2</sup> |
| CCDC17                      | Coiled-coil domain containing 17                                                             | -1.82                    | 1.7x10 <sup>-2</sup> |
| LOC100507634                | Uncharacterized LOC100507634                                                                 | -1.62                    | 1.9x10 <sup>-2</sup> |
| PANDAR                      | Promoter Of CDKN1A (cyclin-dependent kinase inhibitor 1A) antisense DNA damage activated RNA | -2.73                    | 1.9x10 <sup>-2</sup> |
| LOC727751                   | Golgin A2 Pseudogene                                                                         | -3.02                    | 2.0x10 <sup>-2</sup> |
| P4HA2-AS1                   | P4HA2 (prolyl 4-hydroxylase subunit alpha 2) antisense RNA 1                                 | -1.53                    | 3.0x10 <sup>-2</sup> |
| CRIP2                       | Cysteine-rich protein 2                                                                      | -3.45                    | 3.1x10 <sup>-2</sup> |
| RPS14P3                     | Ribosomal protein S14 pseudogene 3                                                           | -1.90                    | 3.4x10 <sup>-2</sup> |
| CRYAB                       | Crystallin, alpha B                                                                          | -3.42                    | 3.4x10 <sup>-2</sup> |
| CCL28                       | Chemokine (C-C motif) ligand 28                                                              | -3.45                    | 3.5x10 <sup>-2</sup> |
| MTVR2                       | Mouse mammary tumor virus receptor homolog 2                                                 | -2.99                    | 3.8x10 <sup>-2</sup> |
| PFN2                        | Profilin 2                                                                                   | -1.51                    | 4.1x10 <sup>-2</sup> |
| ZASP                        | ZO-2 associated speckle protein                                                              | -                        | 4.2x10 <sup>-2</sup> |
|                             |                                                                                              | 22.28                    |                      |
| DNALI1                      | Dynein, axonemal, light intermediate chain 1                                                 | -1.66                    | 4.3x10 <sup>-2</sup> |
| SNCAIP                      | Synuclein, alpha interacting protein                                                         | -1.57                    | 4.5x10 <sup>-2</sup> |
| SUGT1P1                     | SUGT1 (SGT1 homolog, MIS12 kinetochore complex assembly cochaperone) pseudogene 1            | -3.68                    | 4.5x10 <sup>-2</sup> |
| FAM228A                     | Family with sequence similarity 228, member A                                                | -1.67                    | 4.6x10 <sup>-2</sup> |
| TRIM61                      | Tripartite motif containing 61                                                               | -1.62                    | 4.6x10 <sup>-2</sup> |

<sup>1</sup> RNA sequencing analysis of the Alveolar Macrophages (AM) from n=7 users of E-cigarettes with nicotine vs baseline naïve, never smoker AM from matched individuals. Genes are listed based on p value of gene expression after exposure compared to pre-exposure of the same individuals.

<sup>2</sup> Fold-change = mean FPKM expression in E-cigarette with nicotine smokers/mean FPKM expression in never smokers.

**Supplemental Table VII. Alveolar Macrophage Differentially Expressed Genes Following Acute Inhalation of E-cigarettes without Nicotine<sup>1</sup>**

| Gene symbol                 | Gene title                                                                                                                                                      | Fold-change <sup>2</sup> | p value               |
|-----------------------------|-----------------------------------------------------------------------------------------------------------------------------------------------------------------|--------------------------|-----------------------|
| <b>Up-regulated genes</b>   |                                                                                                                                                                 |                          |                       |
| C1orf159                    | Chromosome 1 open reading frame 159                                                                                                                             | 1.59                     | 4.3x10 <sup>-4</sup>  |
| INTS6-AS1                   | INTS6 antisense RNA 1                                                                                                                                           | 1.92                     | 1.2x10 <sup>-3</sup>  |
| ULBP3                       | UL16 binding protein 3                                                                                                                                          | 4.46                     | 7.7x10 <sup>-3</sup>  |
| LOC284632                   | Uncharacterized LOC284632                                                                                                                                       | 3.53                     | 9.7x10 <sup>-3</sup>  |
| SLX1A-SULT1A3               | SLX1A (SLX1 homolog A, structure-specific endonuclease subunit) - SULT1A3 (sulfotransferase family 1A member 3) naturally-occurring readthrough (NMD candidate) | 2.27                     | 1.1x10 <sup>-2</sup>  |
| PHKG1                       | Phosphorylase kinase, gamma 1 (muscle)                                                                                                                          | 2.65                     | 1.6 x10 <sup>-2</sup> |
| ALKBH6                      | AlkB, alkylation repair homolog 6 ( <i>E. coli</i> )                                                                                                            | 1.72                     | 2.2 x10 <sup>-2</sup> |
| ZNF433                      | Zinc finger protein 433                                                                                                                                         | 1.82                     | 2.3 x10 <sup>-2</sup> |
| PTGER3                      | Prostaglandin E receptor 3 (subtype EP3)                                                                                                                        | 2.26                     | 2.6 x10 <sup>-2</sup> |
| GAD1                        | Glutamate decarboxylase 1 (brain, 67kDa)                                                                                                                        | 1.59                     | 2.9 x10 <sup>-2</sup> |
| FAHD2CP                     | Fumarylacetoacetate hydrolase domain containing 2C, pseudogene                                                                                                  | 1.77                     | 3.1 x10 <sup>-2</sup> |
| RPL13P5                     | Ribosomal protein L13 pseudogene 5                                                                                                                              | 1.75                     | 3.3x10 <sup>-2</sup>  |
| SLC43A2                     | Solute carrier family 43 (amino acid system L transporter), member 2                                                                                            | 1.77                     | 3.4x10 <sup>-2</sup>  |
| TUBA1C                      | Tubulin, alpha 1c                                                                                                                                               | 1.67                     | 3.5x10 <sup>-2</sup>  |
| RPP21                       | Ribonuclease P/MRP subunit P21                                                                                                                                  | 1.57                     | 3.6x10 <sup>-2</sup>  |
| TUBB6                       | Tubulin, beta 6 class V                                                                                                                                         | 1.69                     | 3.8x10 <sup>-2</sup>  |
| SMAD6                       | SMAD family member 6                                                                                                                                            | 1.68                     | 4.2x10 <sup>-2</sup>  |
| IGSF22                      | Immunoglobulin superfamily, member 22                                                                                                                           | 2.12                     | 4.3x10 <sup>-2</sup>  |
| CCNB2                       | Cyclin B2                                                                                                                                                       | 1.54                     | 4.4x10 <sup>-2</sup>  |
| TMEM88                      | Transmembrane protein 88                                                                                                                                        | 3.68                     | 4.5x10 <sup>-2</sup>  |
| GPR68                       | G protein-coupled receptor 68                                                                                                                                   | 2.44                     | 4.5x10 <sup>-2</sup>  |
| PROCR                       | Protein C receptor, endothelial                                                                                                                                 | 1.84                     | 4.5x10 <sup>-2</sup>  |
| LOC101928865                | Uncharacterized LOC101928865                                                                                                                                    | 2.18                     | 4.6x10 <sup>-2</sup>  |
| HIST1H1C                    | Histone cluster 1, H1c                                                                                                                                          | 2.06                     | 5.0x10 <sup>-2</sup>  |
| C21orf140                   | Chromosome 21 open reading frame 140                                                                                                                            | 1.83                     | 5.0x10 <sup>-2</sup>  |
| <b>Down-regulated genes</b> |                                                                                                                                                                 |                          |                       |
| APOBEC3F                    | Apolipoprotein B mRNA editing enzyme, catalytic polypeptide-like 3F                                                                                             | -1.53                    | 1.9x10 <sup>-3</sup>  |
| PSMG4                       | Proteasome (prosome, macropain) assembly chaperone 4                                                                                                            | -1.69                    | 3.5x10 <sup>-3</sup>  |
| LYPD5                       | LY6/PLAUR domain containing 5                                                                                                                                   | -1.92                    | 5.3x10 <sup>-3</sup>  |
| SETSIP                      | SET-like protein                                                                                                                                                | -6.08                    | 7.1x10 <sup>-3</sup>  |
| LINC00957                   | Long intergenic non-protein coding RNA 957                                                                                                                      | -2.70                    | 9.9x10 <sup>-3</sup>  |
| SH3BGR                      | SH3 domain binding glutamate-rich protein                                                                                                                       | -1.76                    | 1.1x10 <sup>-2</sup>  |
| KRTCAP3                     | Keratinocyte associated protein 3                                                                                                                               | -7.13                    | 1.3x10 <sup>-2</sup>  |
| FOXM1                       | Forkhead box M1                                                                                                                                                 | -1.61                    | 1.7x10 <sup>-2</sup>  |

**Supplemental Table VII. Alveolar Macrophage Differentially Expressed Genes Following Acute Inhalation of E-cigarettes without Nicotine<sup>1</sup> (cont., page 5)**

| Gene symbol | Gene title                                                                       | Fold-change <sup>2</sup> | p value              |
|-------------|----------------------------------------------------------------------------------|--------------------------|----------------------|
| CDK6        | Cyclin-dependent kinase 6                                                        | -1.79                    | 1.7x10 <sup>-2</sup> |
| PMS2P4      | Postmeiotic segregation increased 2 pseudogene 4                                 | -1.75                    | 1.9x10 <sup>-2</sup> |
| CHST10      | Carbohydrate sulfotransferase 10                                                 | -2.58                    | 2.2x10 <sup>-2</sup> |
| VNN3        | Vanin 3                                                                          | -1.67                    | 2.2x10 <sup>-2</sup> |
| SIT1        | Signaling threshold regulating transmembrane adaptor 1                           | -4.17                    | 2.2x10 <sup>-2</sup> |
| FAM86JP     | Family with sequence similarity 86 member J, pseudogene                          | -1.99                    | 2.2x10 <sup>-2</sup> |
| CMTM2       | CKLF (chemokine-like factor)-like MARVEL transmembrane domain containing 2       | -8.66                    | 2.4x10 <sup>-2</sup> |
| TRAF3IP3    | TRAF3 (TNF receptor associated Factor 3) interacting protein 3                   | -2.53                    | 2.4x10 <sup>-2</sup> |
| GCSAM       | Germinal center-associated, signaling and motility                               | -2.16                    | 2.4x10 <sup>-2</sup> |
| CD244       | CD244 molecule, natural killer cell receptor 2B4                                 | -2.51                    | 2.4x10 <sup>-2</sup> |
| FBF1        | Fas (TNFRSF6) binding factor 1                                                   | -2.37                    | 2.6x10 <sup>-2</sup> |
| TBX6        | T-box 6                                                                          | -2.28                    | 2.6x10 <sup>-2</sup> |
| RAVER2      | Ribonucleoprotein, PTB-binding 2                                                 | -2.30                    | 2.8x10 <sup>-2</sup> |
| SPATA18     | Spermatogenesis associated 18                                                    | -1.72                    | 2.8x10 <sup>-2</sup> |
| C1orf213    | Chromosome 1 open reading frame 213                                              | -1.58                    | 2.9x10 <sup>-2</sup> |
| ANKRD29     | Ankyrin repeat domain 29                                                         | -1.81                    | 2.9x10 <sup>-2</sup> |
| WDR17       | WD repeat domain 17                                                              | -1.69                    | 3.0x10 <sup>-2</sup> |
| FAM84B      | Family with sequence similarity 84, member B                                     | -2.22                    | 3.3x10 <sup>-2</sup> |
| YIF1B       | Yip1 interacting factor homolog B ( <i>S. cerevisiae</i> )                       | -1.56                    | 3.3x10 <sup>-2</sup> |
| CEACAM1     | Carcinoembryonic antigen-related cell adhesion molecule 1 (biliary glycoprotein) | -2.38                    | 3.5x10 <sup>-2</sup> |
| LOC153684   | Uncharacterized LOC153684                                                        | -1.74                    | 3.6x10 <sup>-2</sup> |
| FGD1        | FYVE, RhoGEF and PH domain containing 1                                          | -2.04                    | 3.7x10 <sup>-2</sup> |
| TLN2        | Talin 2                                                                          | -1.82                    | 3.7x10 <sup>-2</sup> |
| ITGA6       | Integrin, alpha 6                                                                | -1.71                    | 4.0x10 <sup>-2</sup> |
| HLA-DOA     | Major histocompatibility complex, class II, DO alpha                             | -1.75                    | 4.0x10 <sup>-2</sup> |
| ANKMY1      | Ankyrin repeat and MYND domain containing 1                                      | -1.68                    | 4.4x10 <sup>-2</sup> |
| CORO1A      | Coronin, actin binding protein, 1A                                               | -2.13                    | 4.7x10 <sup>-2</sup> |
| TTC28-AS1   | TTC28 (tetratricopeptide repeat domain 28) anti-sense RNA 1                      | -2.17                    | 4.9x10 <sup>-2</sup> |

<sup>1</sup> RNA sequencing analysis of Alveolar Macrophages (AM) from n=7 users of E-cigarettes without nicotine vs baseline naïve, never smoker AM from matched individuals. Genes are listed based on p value of gene expression after exposure compared to pre-exposure of the same individuals.

<sup>2</sup> Fold-change = mean FPKM expression in E-cigarette with nicotine smokers/mean FPKM expression in never smokers.
